# Supplementary material
Source: publisher figshare collection journal article supplement (https://acs.figshare.com/ndownloader/files/7030817)
Supplement: Supplementary file 1 [file 7030817]

# Protein Concentrate Production from Thin Stillage

Kornsulee Ratanapariyanuch,<sup>†</sup> Youn Young Shim,<sup>\*,†,‡,§</sup> Shahram Emami,<sup>†</sup> Martin J. T. Reaney<sup>\*,†,‡,§</sup>

## SUPPORTING INFORMATION

**Table S1.** Mass balance of clarification of replications of small-scale TSF replicate 2.

**Table S2.** Protein and moisture contents of wash fractions from pilot-scale processing replicate 2.

**Figure S1.** Moisture and protein contents: (A) moisture content of fermenter 1 wash fractions, (B) protein content of fermenter 1 wash fractions, (C) moisture content of fermenter 1 wash fractions, and (D) protein content of fermenter 2 wash fractions after washing slurry I from fermentation at 25 °C (replicate 2). Each value is presented as the mean  $\pm$  standard deviation (SD,  $n = 2$ ). Total nitrogen was determined by the Kjeldahl method. Corrected protein was calculated using conversion factor of 5.7 times N and expressed as crude protein. Nitrogen in the samples contributed by GPC and betaine was determined by DPGFSE-NMR. Nitrogen contributed by these materials to total nitrogen was subtracted prior to calculation of protein content.

**Figure S2.** Concentration (g/L) of organic solutes of liquid fractions from washing slurry I after fermentation at 25 °C of (A) fermenter 1 and (B) fermenter 2 replicate 2. The concentration of glycerol in the samples may be affected by the presence of interfering resonances from carbohydrate and protein

**Figure S3.** Concentration (g/L) of 1,3-PD, acetic acid, glycerol, GPC, and lactic acid from washing of replications of small-scale TSF of (A) slurry I, (B) liquid after decanting, and (C) liquid after desludging replicate 2.

**Figure S4.** Protein balance of pilot-scale processing replicate 1.

**Figure S5.** Glycerol balance of pilot-scale processing replicate 1.

**Figure S6.** 1,3-PD balance of pilot-scale processing replicate 1.

**Figure S7.** Lactic acid balance of pilot-scale processing replicate 1.

**Figure S8.** Acetic acid balance of pilot-scale processing replicate 1.

**Figure S9.** GPC balance of pilot-scale processing replicate 1.

**Table S1. Mass Balance of Clarification of Replications of Small-scale TSF Replicate 2**

| sample                               | weight of sample (kg) |
|--------------------------------------|-----------------------|
| slurry I                             | 227.23                |
| liquid I                             | nd <sup>a</sup>       |
| solid I decanter                     | 74.45                 |
| solid I desludger                    | 29.29                 |
| liquid I desludger                   | 142.00                |
| solid II decanter                    | 60.47                 |
| solid II desludger                   | 9.05                  |
| water added for 1 <sup>st</sup> wash | 103.00                |
| liquid II desludger                  | 113.00                |
| solid III decanter                   | 63.30                 |
| solid III desludger                  | 11.70                 |
| water added for 2 <sup>nd</sup> wash | 70.00                 |
| liquid III desludger                 | 63.50                 |

<sup>a</sup>nd = not determined.

**Table S2. Protein and Moisture Contents<sup>a</sup> of Wash Fractions from Pilot-scale Processing Replicate 2**

| sample                                                              | moisture<br>(%, w/w, wb) | protein <sup>b</sup><br>(%, w/w, wb) | protein<br>(%, w/w, db) |
|---------------------------------------------------------------------|--------------------------|--------------------------------------|-------------------------|
| slurry I <sup>c</sup>                                               | 90.26 ± 0.01             | 4.74 ± 0.02                          | 48.68 ± 0.19            |
| solid I decanter                                                    | 81.04 ± 0.07             | 11.75 ± 0.04                         | 62.00 ± 0.46            |
| liquid I decanter <sup>c</sup>                                      | 96.75 ± 0.00             | 0.87 ± 0.02                          | 26.75 ± 0.60            |
| solid I desludger                                                   | 92.87 ± 0.01             | 2.71 ± 0.00                          | 38.02 ± 0.05            |
| liquid I desludger <sup>c</sup>                                     | 97.18 ± 0.00             | 0.66 ± 0.01                          | 23.43 ± 0.47            |
| mixture of solid and water before 1 <sup>st</sup> wash <sup>c</sup> | 92.68 ± 0.01             | 4.16 ± 0.05                          | 56.78 ± 0.69            |
| solid II decanter                                                   | 81.68 ± 0.03             | 11.41 ± 0.10                         | 62.25 ± 0.64            |
| liquid II decanter <sup>c</sup>                                     | 98.48 ± 0.00             | 0.47 ± 0.01                          | 31.09 ± 0.84            |
| solid II desludger                                                  | 93.48 ± 0.00             | 2.87 ± 0.02                          | 44.07 ± 0.34            |
| liquid II desludger <sup>c</sup>                                    | 98.63 ± 0.02             | 0.32 ± 0.01                          | 23.16 ± 0.54            |
| mixture of solid and water before 2 <sup>nd</sup> wash <sup>c</sup> | 92.62 ± 0.00             | 4.53 ± 0.05                          | 61.35 ± 0.65            |
| solid III decanter                                                  | 81.82 ± 0.00             | 11.60 ± 0.20                         | 63.88 ± 1.05            |
| liquid III decanter <sup>c</sup>                                    | 99.16 ± 0.00             | 0.30 ± 0.00                          | 36.27 ± 0.45            |
| solid III desludger                                                 | 96.64 ± 0.00             | 1.65 ± 0.02                          | 49.16 ± 0.06            |
| liquid III desludger <sup>c</sup>                                   | 99.41 ± 0.02             | 0.18 ± 0.01                          | 30.97 ± 2.46            |

<sup>a</sup>Each value is presented as the mean ± SD (*n* = 2). <sup>b</sup>Total nitrogen was determined by the Kjeldahl method. Corrected protein was calculated using conversion factor 5.7 as expressed as crude protein.

<sup>c</sup>Nitrogen in the samples contributed by GPC and betaine was determined by DPGSE-NMR. Nitrogen contributed by these materials to total nitrogen was subtracted prior to calculation of protein content.

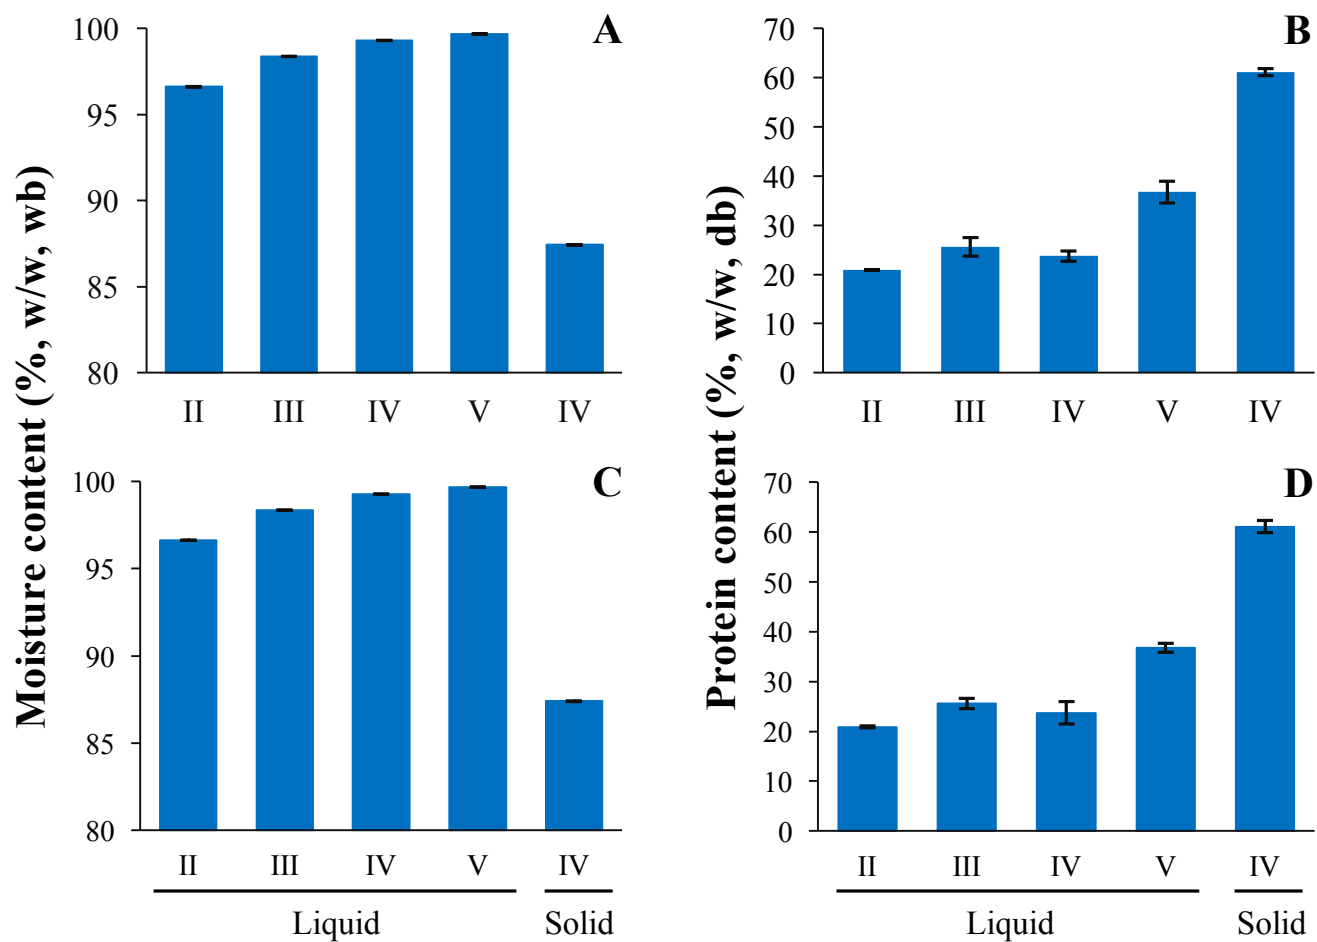

**Figure S1.**

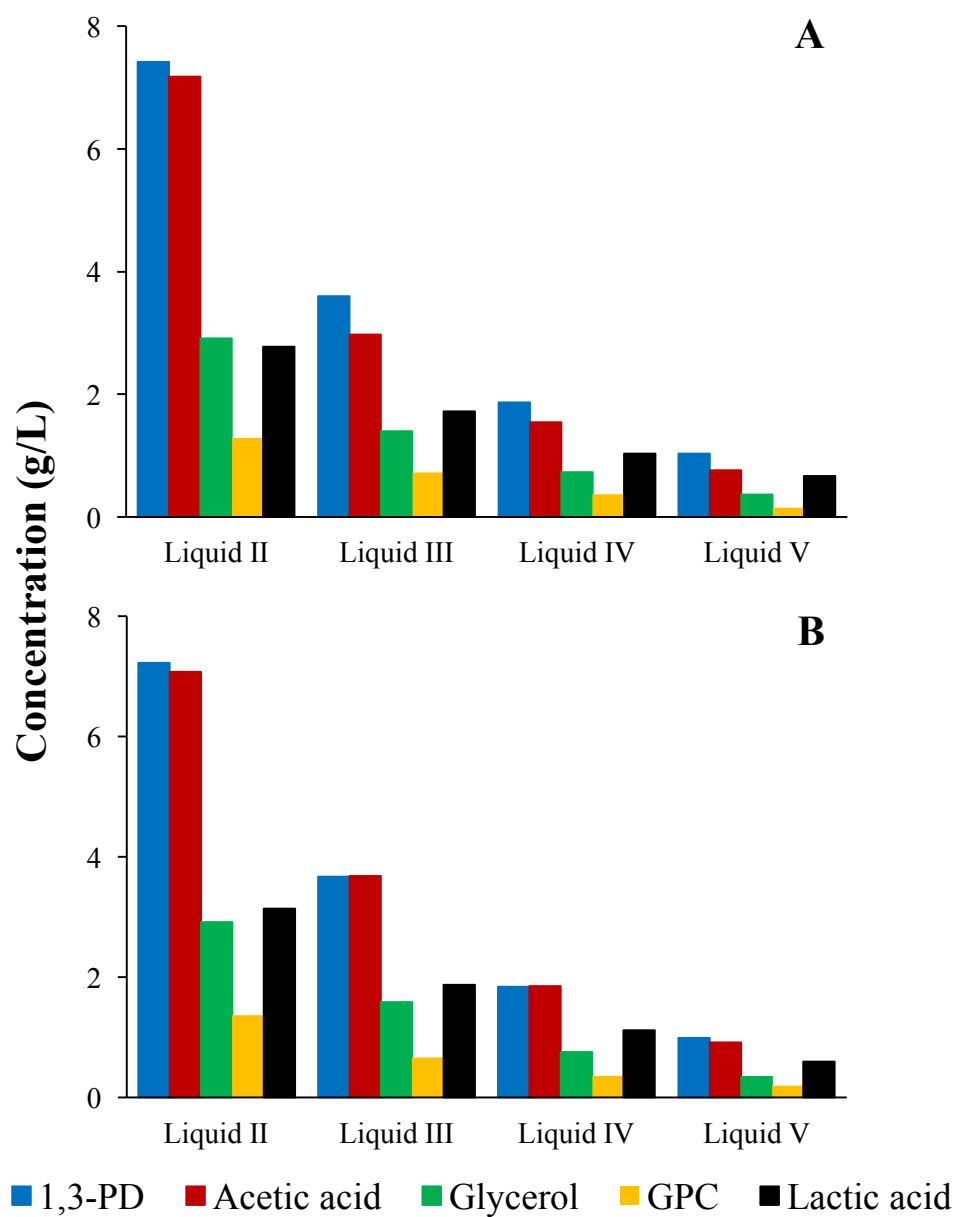

**Figure S2.**

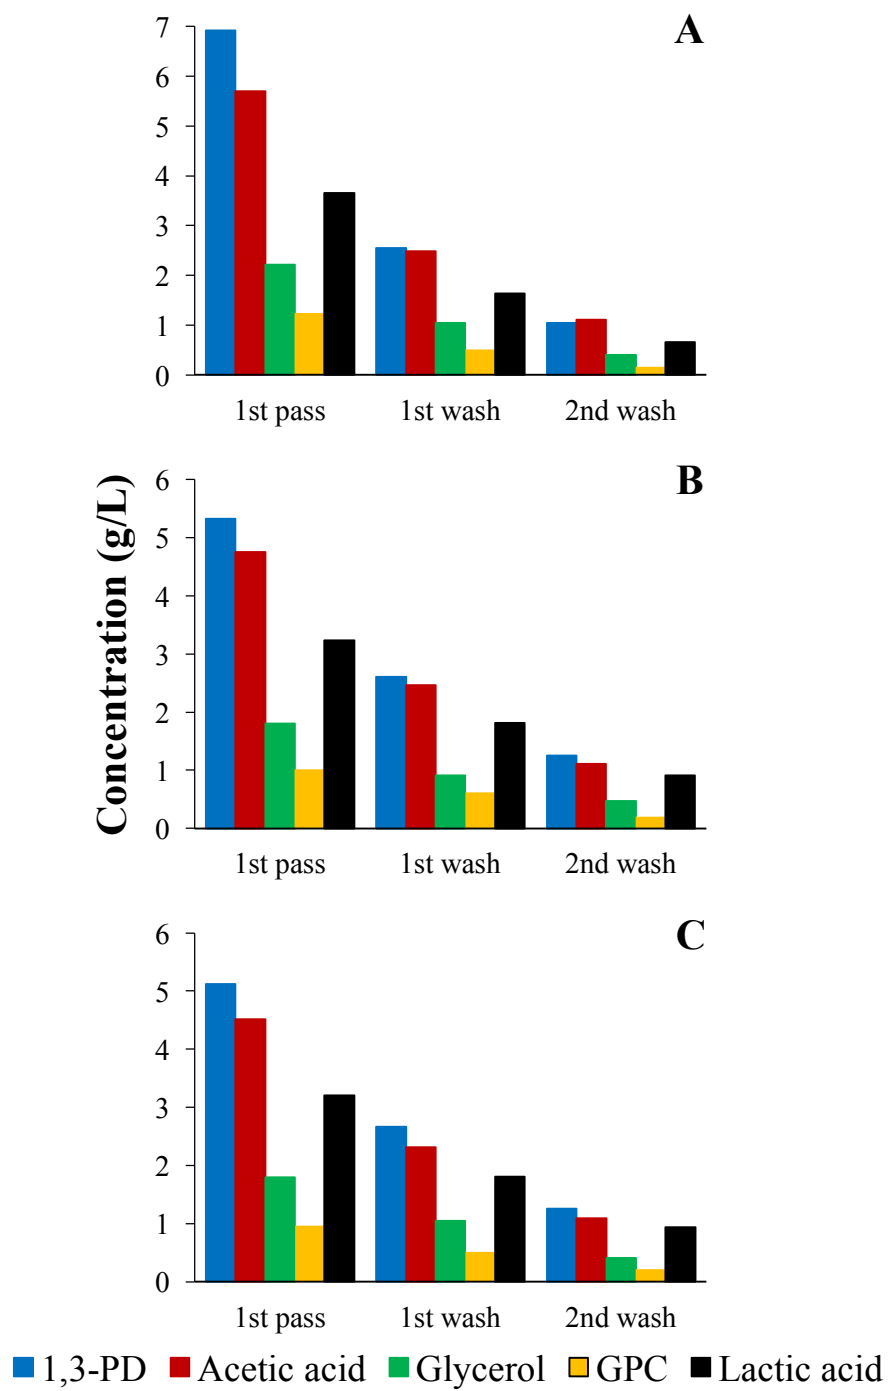

**Figure S3.**

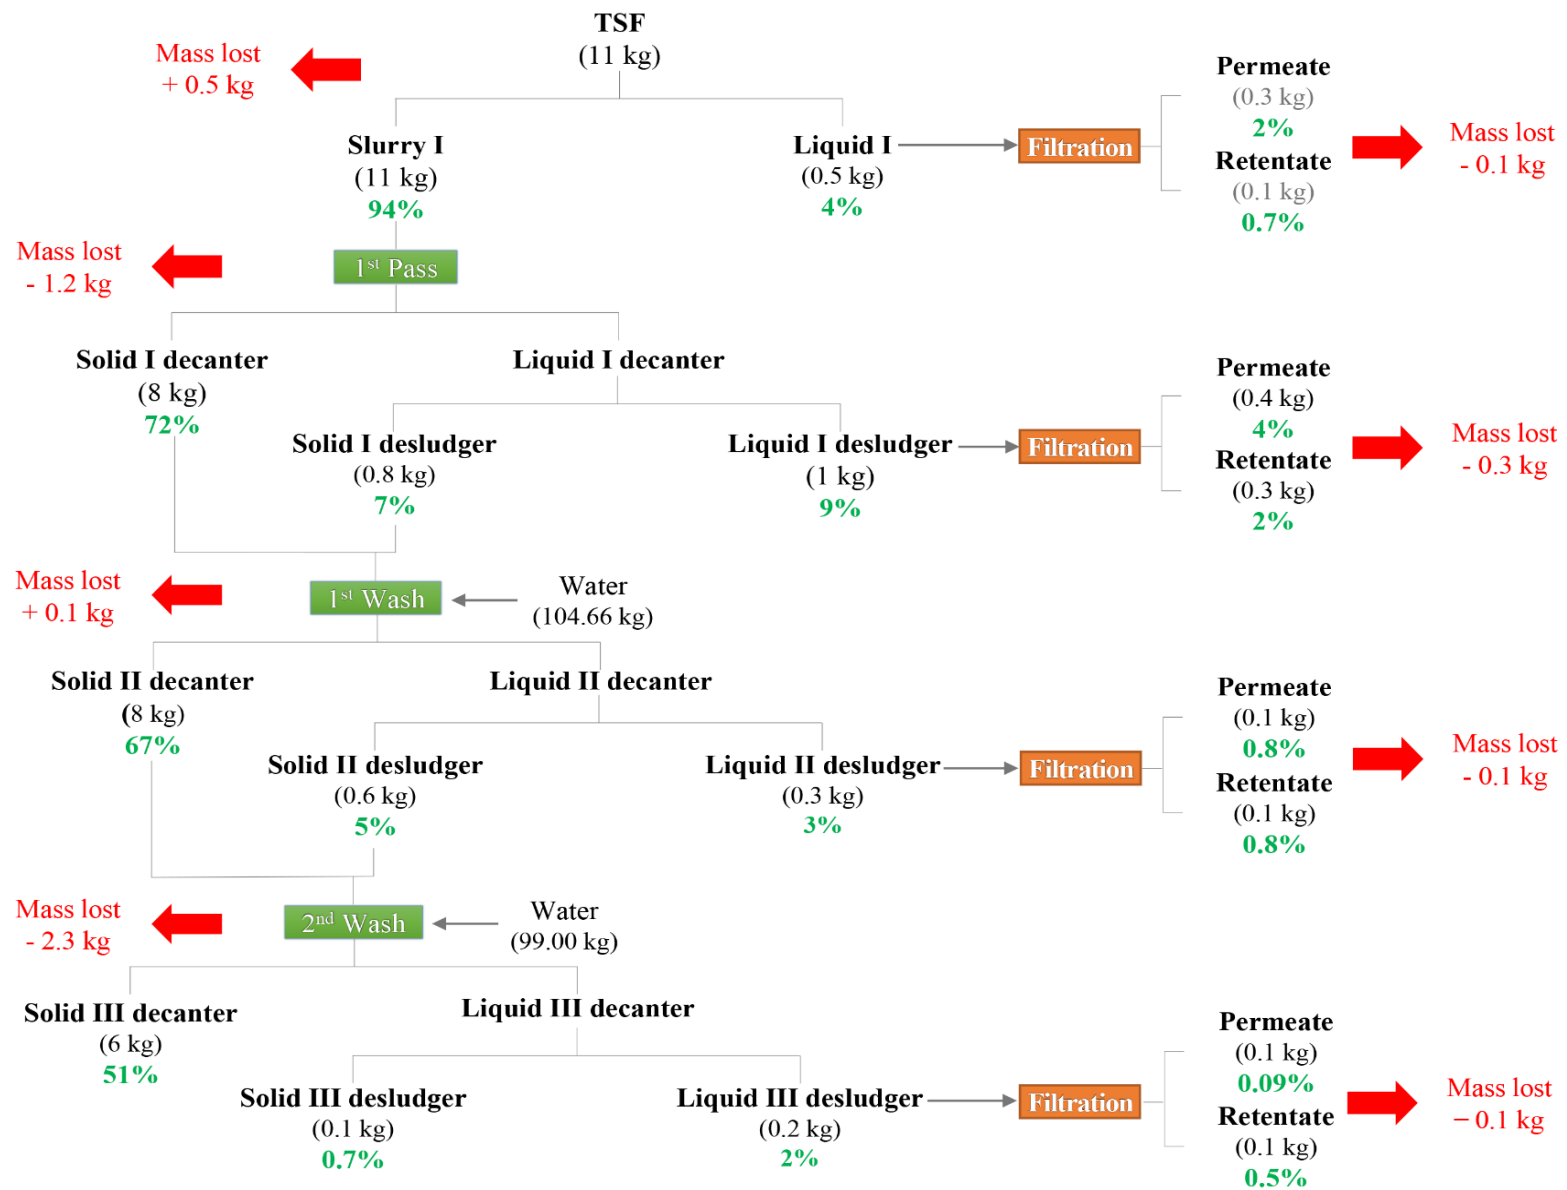

Figure S4.



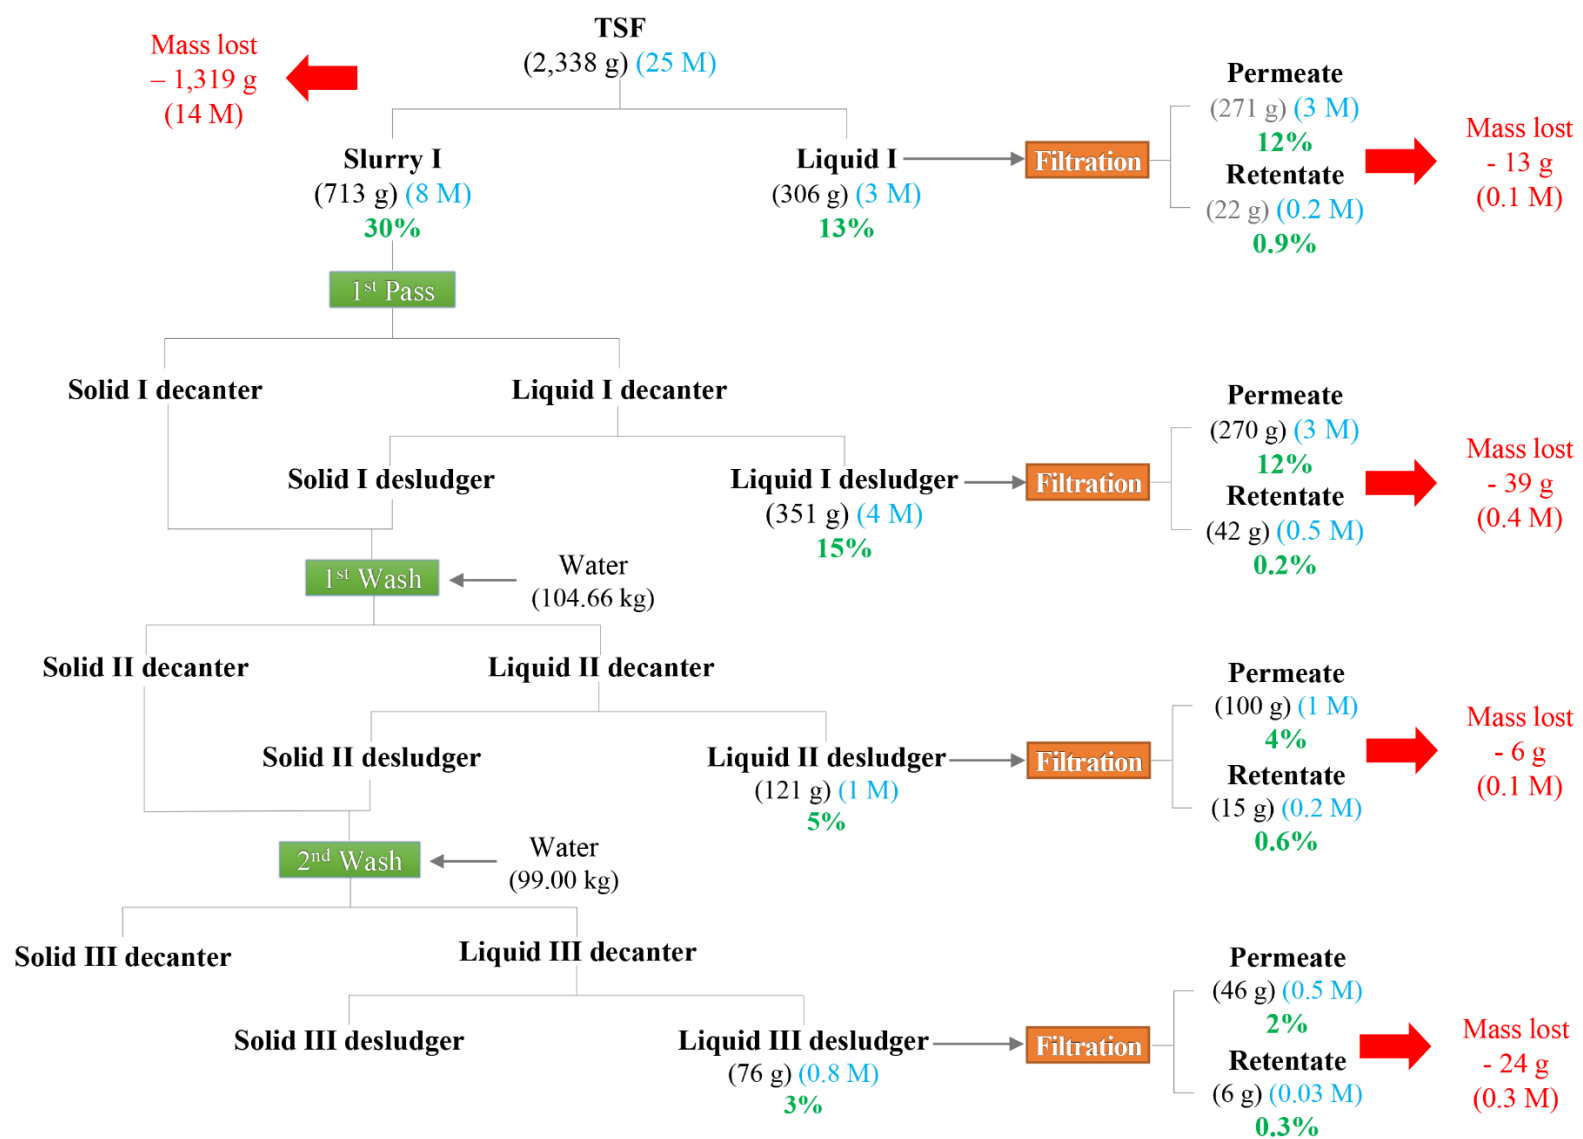

Figure S5.

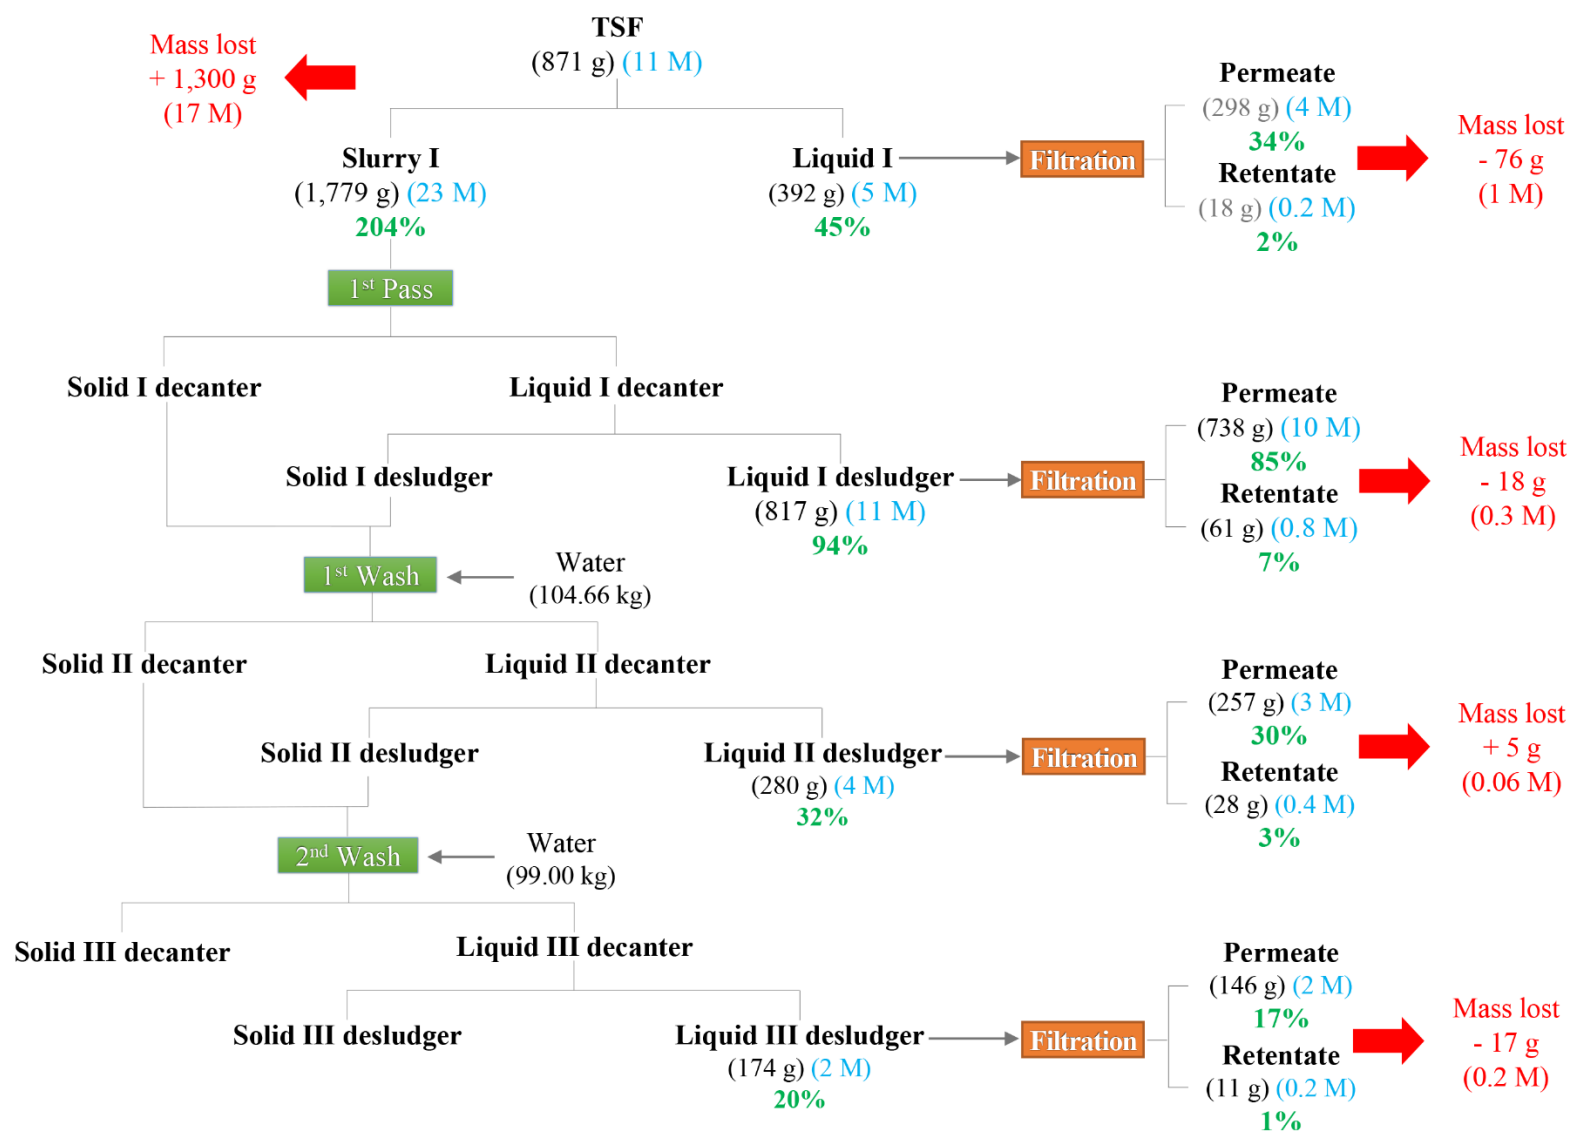

Figure S6.

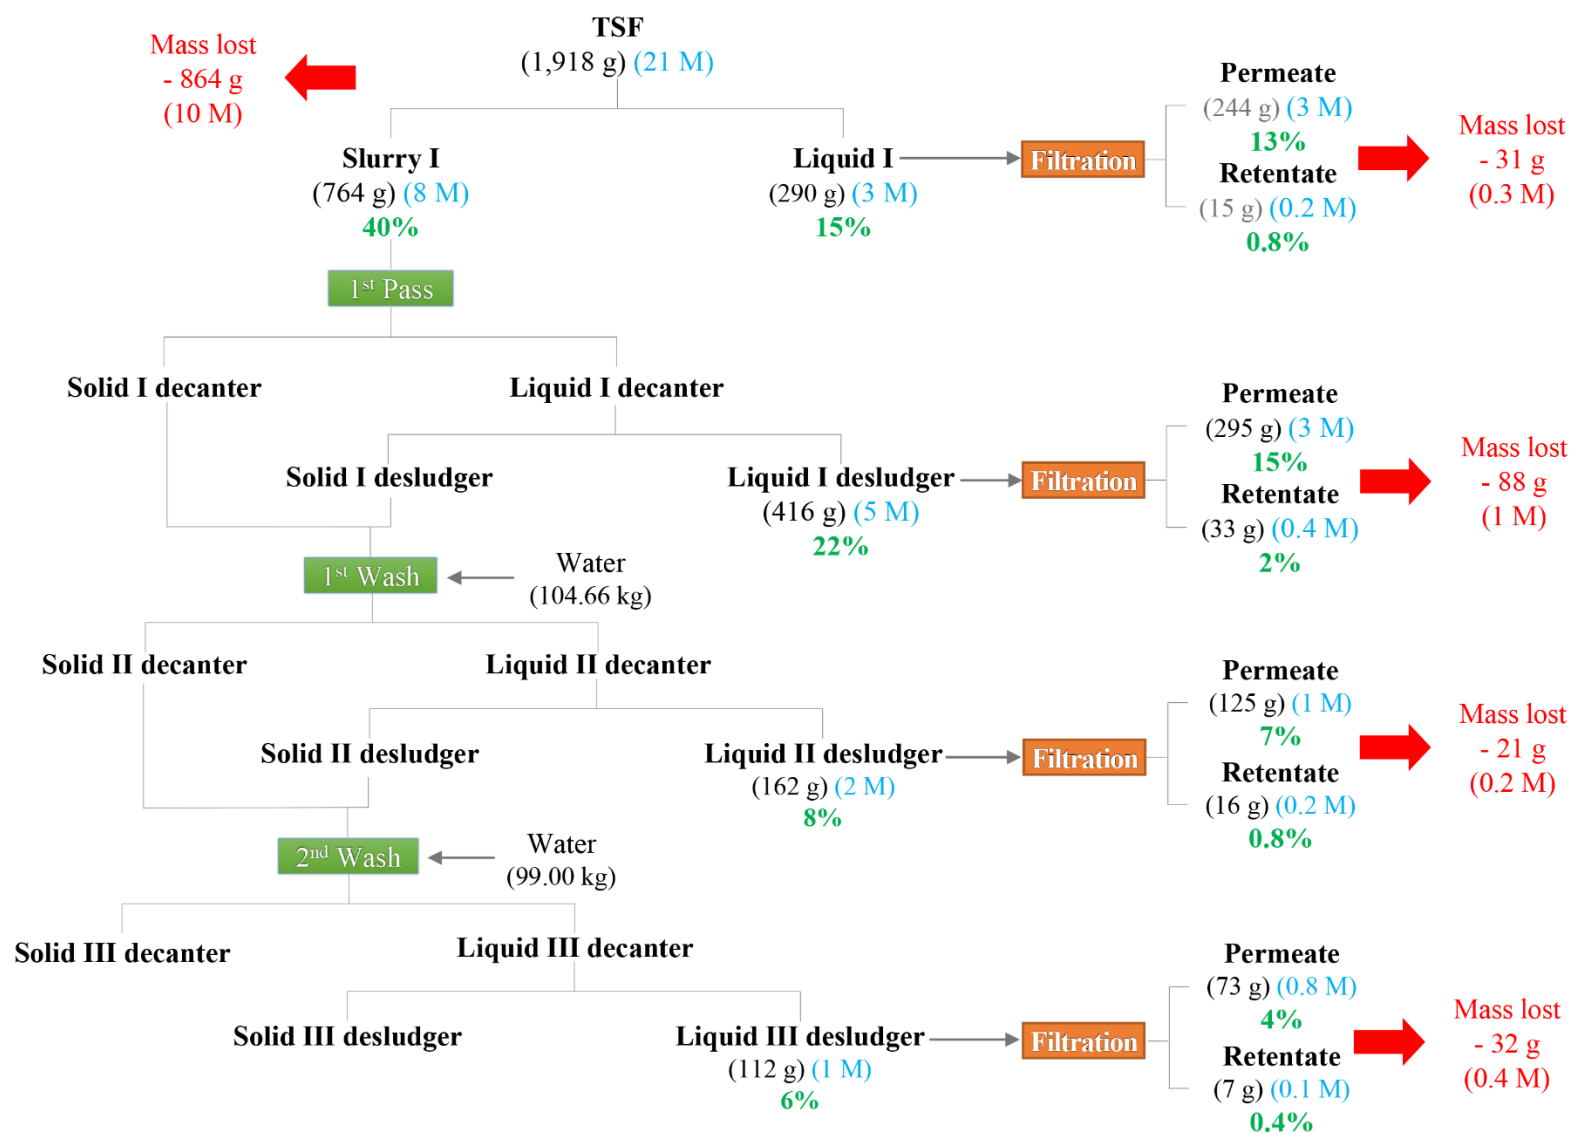

Figure S7.

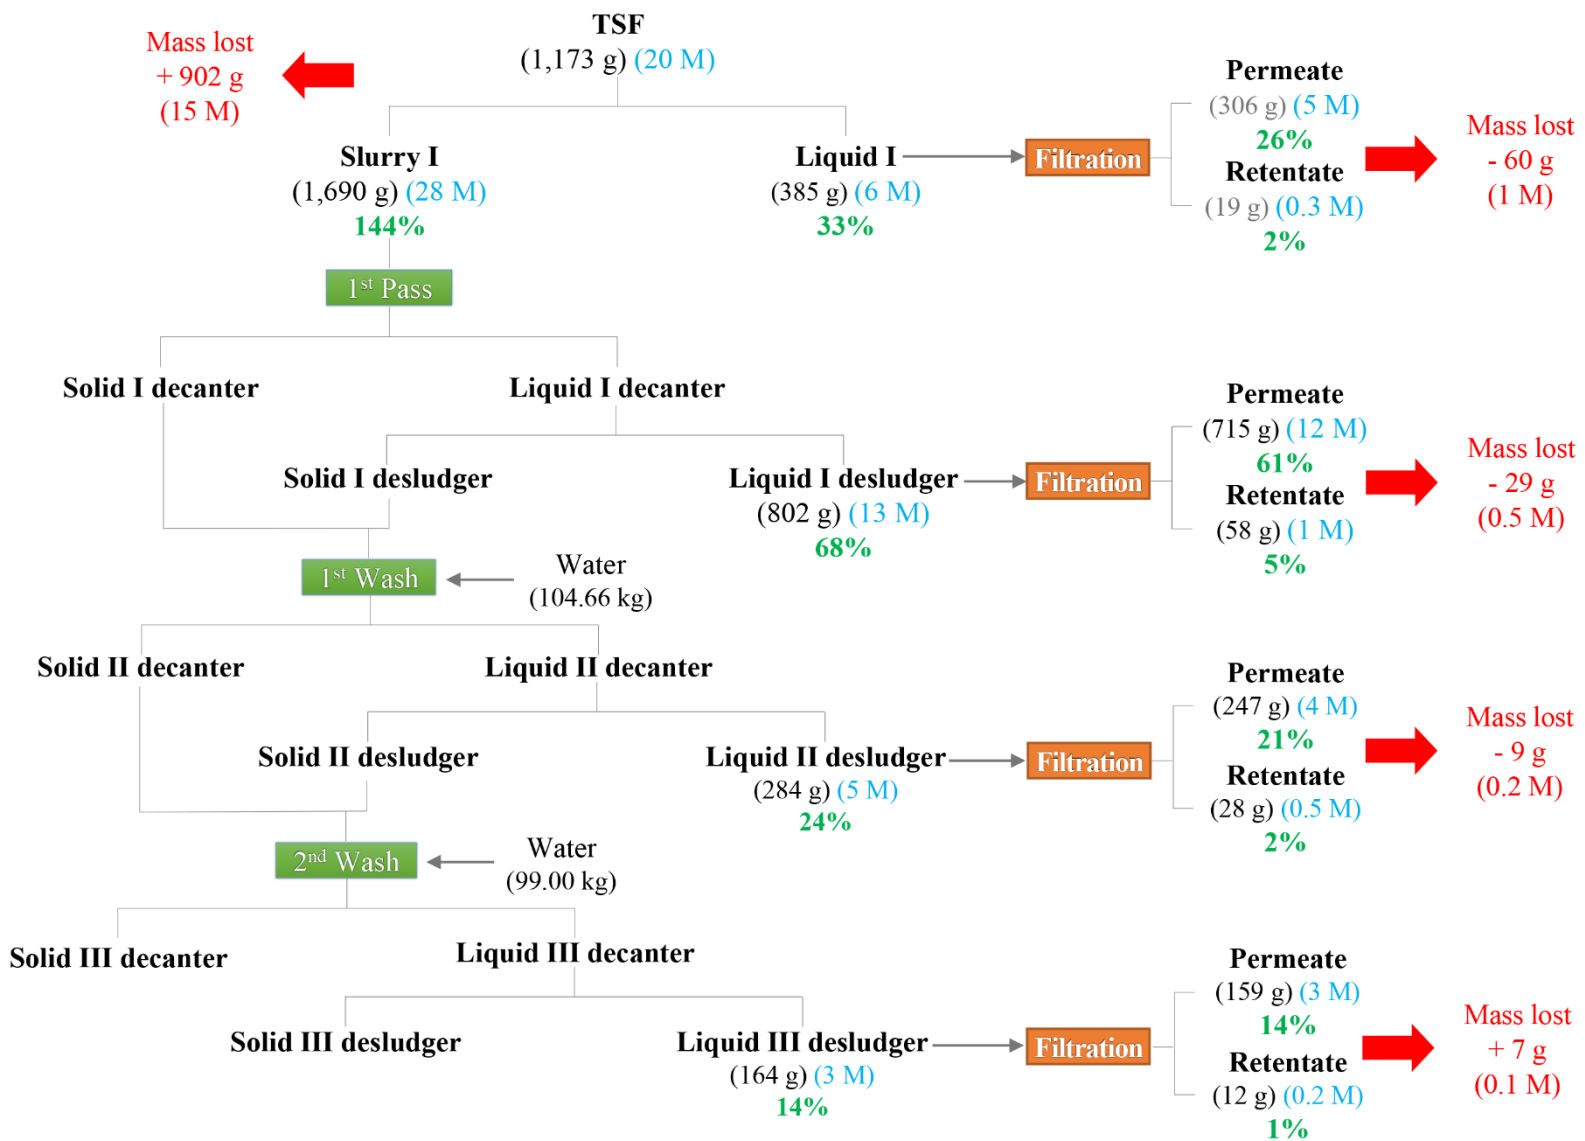

Figure S8.

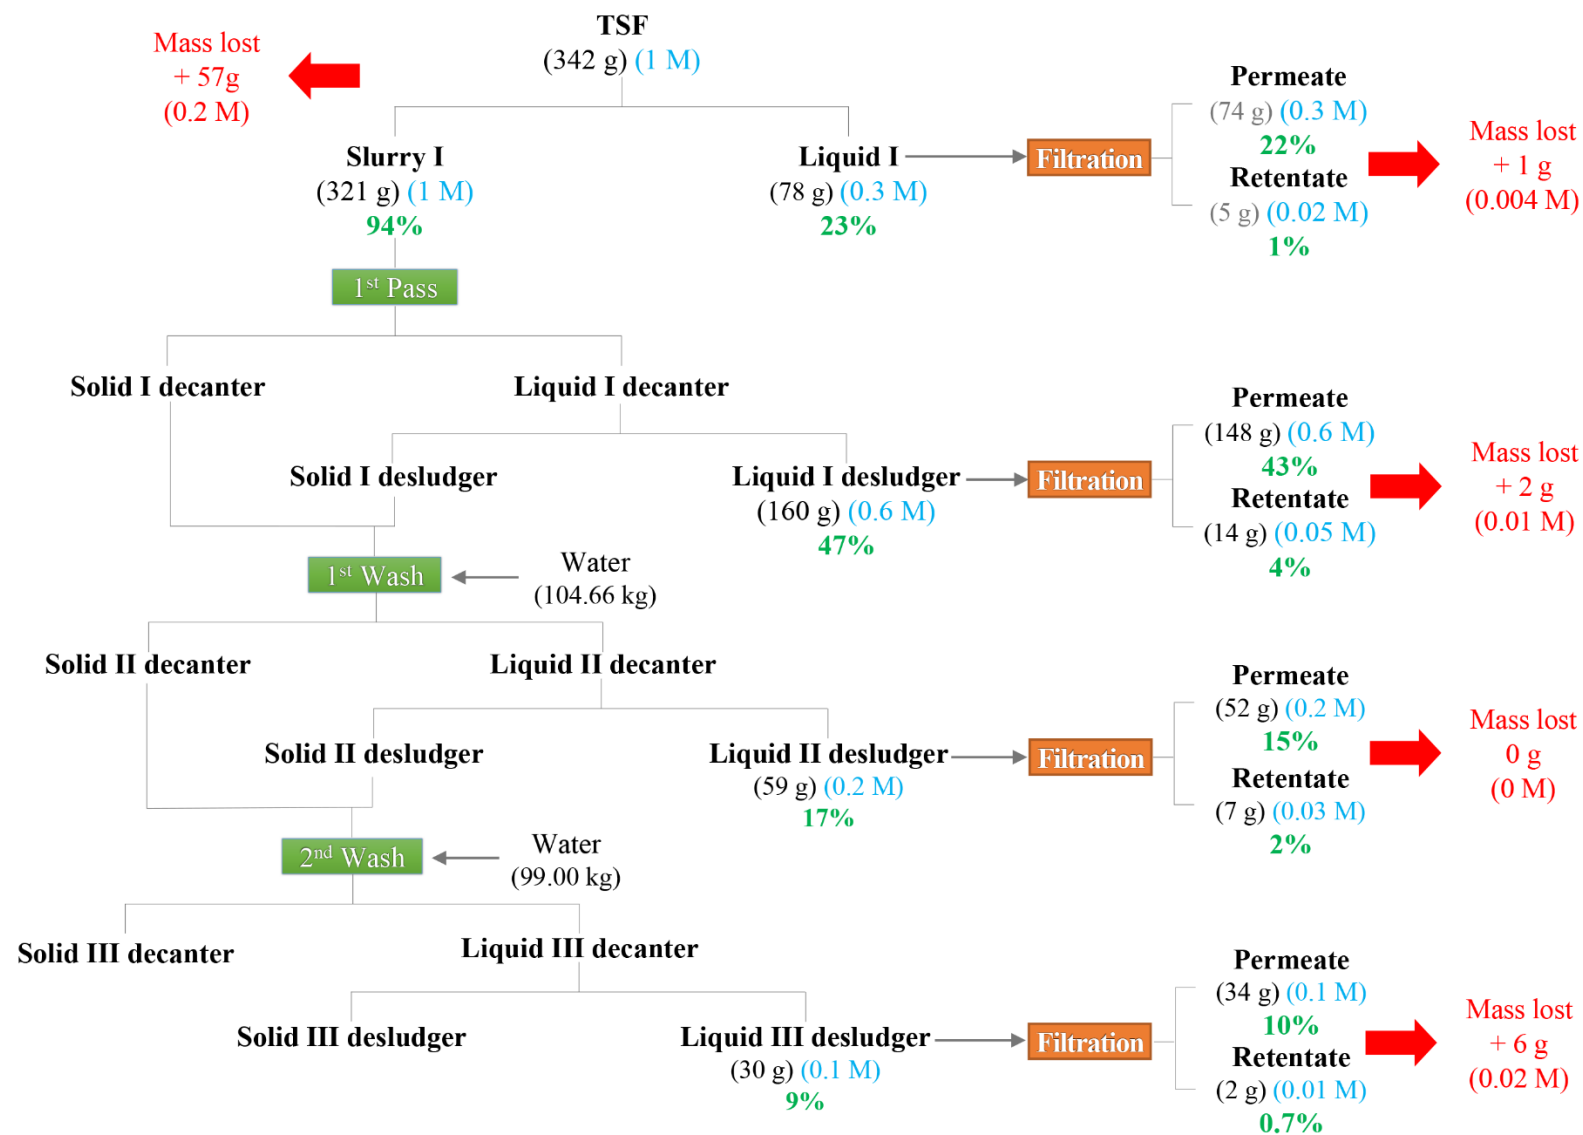

Figure S9.
